# Supplementary material for: Integrated single-cell RNA-seq and DNA methylation reveal the effects of air pollution in patients with recurrent spontaneous abortion
Source: PubMed Central journal article supplement (PMC9400245; doi:10.1186/s13148-022-01327-2), 2022-08-23
Supplement: 13148_2022_1327_MOESM3_ESM.pdf [file 13148_2022_1327_MOESM3_ESM.pdf]

Number of interactions

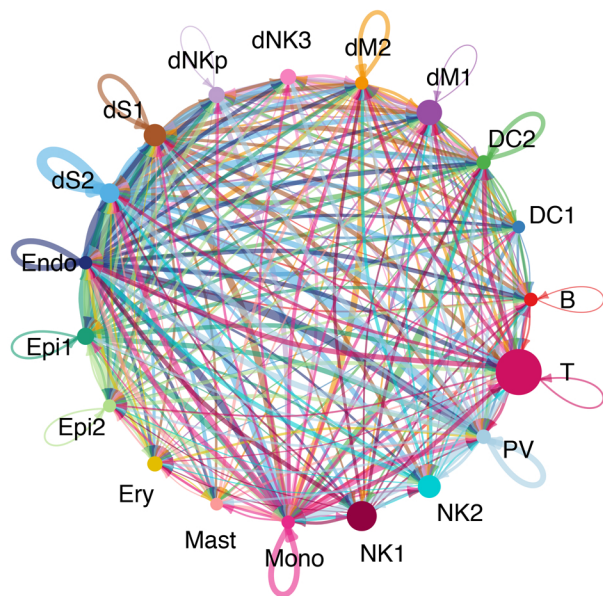

Interaction weights/strength

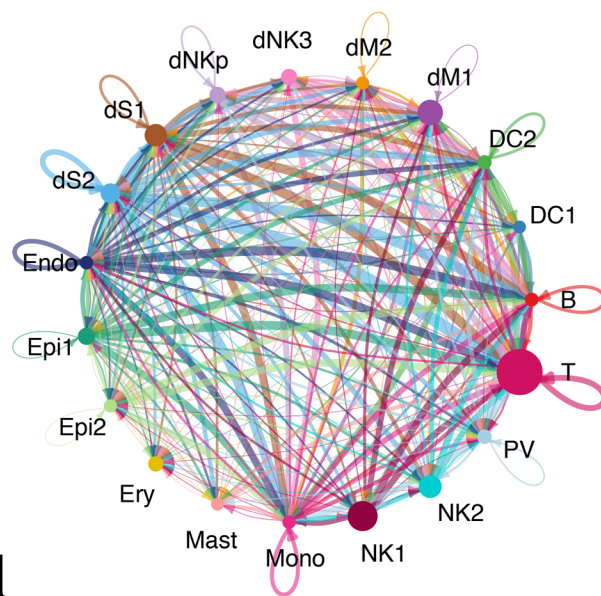

**Control**

Number of interactions

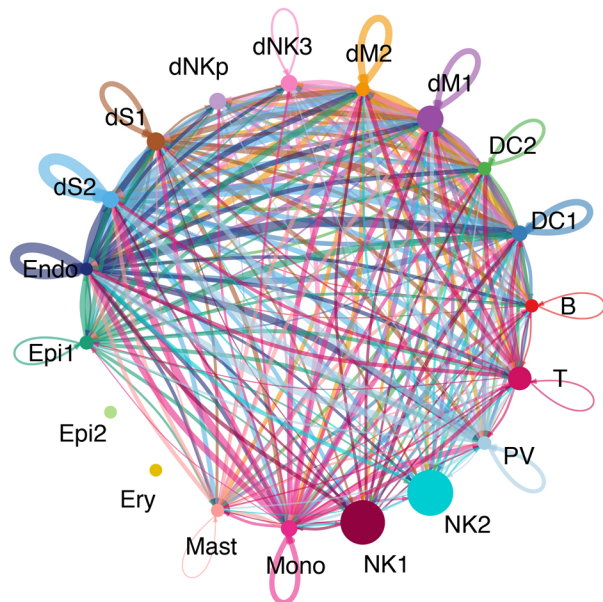

Interaction weights/strength

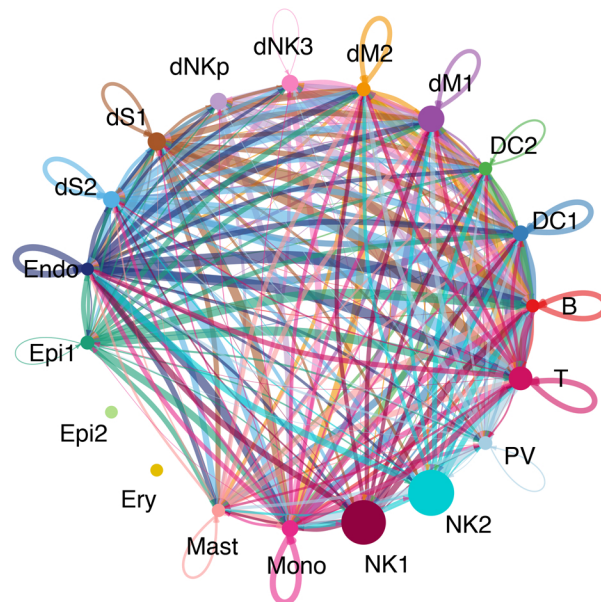

**Case**
