# Supplementary material for: Integrated single-cell RNA-seq and DNA methylation reveal the effects of air pollution in patients with recurrent spontaneous abortion
Source: PubMed Central journal article supplement (PMC9400245; doi:10.1186/s13148-022-01327-2), 2022-08-23

**A**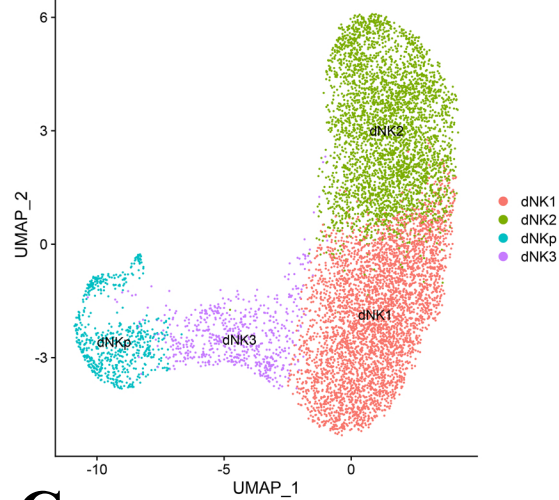**B**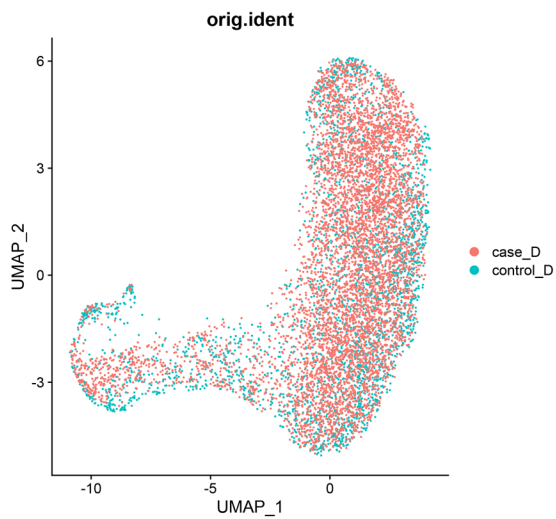**C**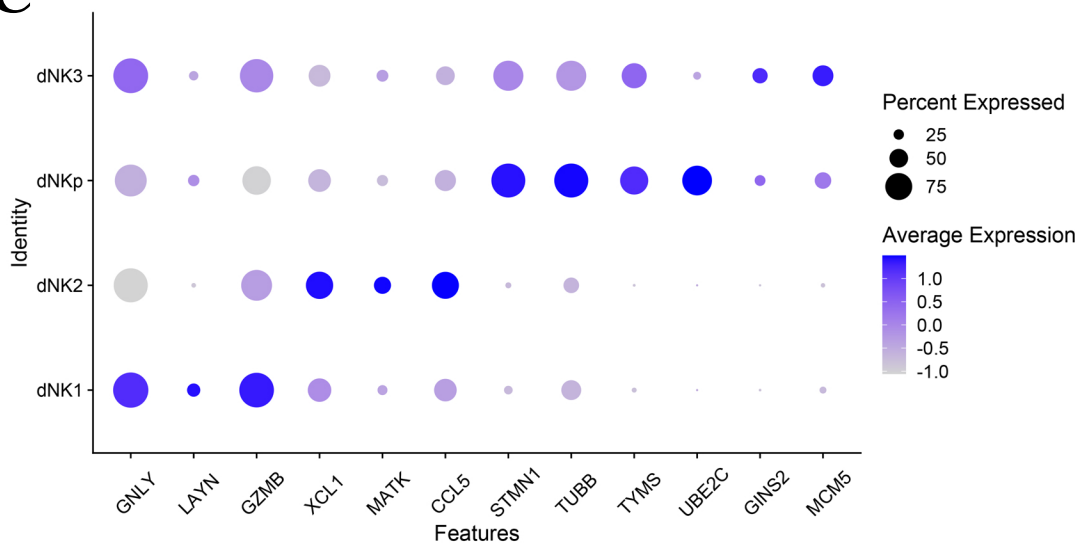**D**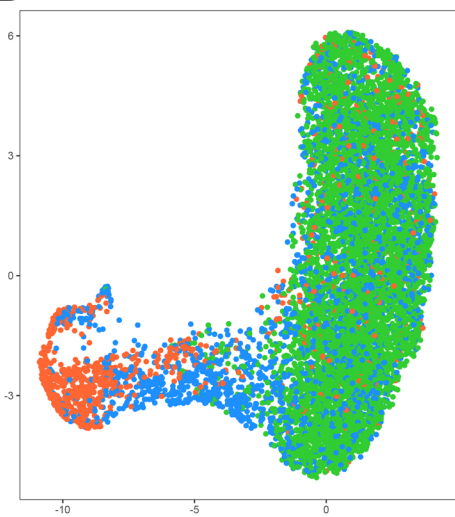**E**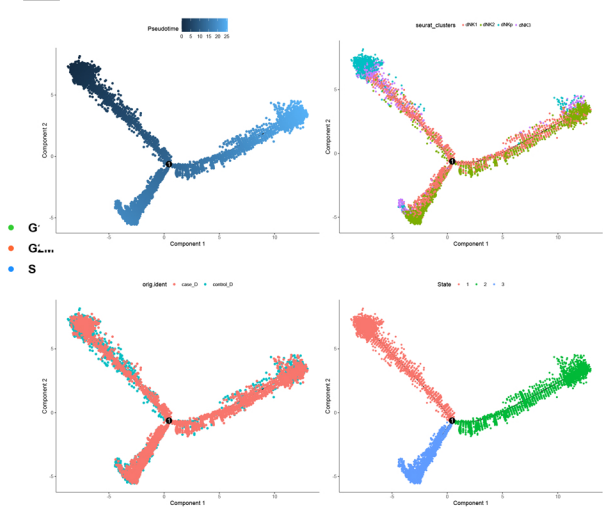

Supplement: 13148_2022_1327_MOESM4_ESM.pdf [file 13148_2022_1327_MOESM4_ESM.pdf]
